# Supplementary material
Source: Springer Nature journal article supplement (https://www.springermedizin.de/resource/supplementary/12903_2013_351_MOESM4_ESM.docx/9516806)
Supplement: MOESM4 [file 9516806]

**Table 2 Caries prevalence according to the tooth type**

|  | Anterior (Incisors and Canines) | Posterior (Molars) | p-value |
| --- | --- | --- | --- |
| All | 522(72%) | 497(69%) | <0.001 |
| Maxillary arch | 514(71%) | 388(54%) | <0.001 |
| Mandibular arch | 145(20%) | 432(60%) | <0.001 |
| p-value | <0.001 | <0.001 |  |
